# Supplementary material for: Simultaneous control of polymorphism and morphology via gelatin induction for concomitant systems: case study of sulfathiazole
Source: Royal Society of Chemistry journal article supplement (doi:10.1039/d2ce00559j), 2022-01-01
Supplement: d2ce00559j2.pdf [file d2ce00559j2.pdf]

## Supporting information for :

### **Simultaneous control of polymorph and morphology via gelatin induction for concomitant system: case study of sulfathiazole**

Jinqi Lan,<sup>a</sup> Yunhe Bai,<sup>a</sup> Yang Ye,<sup>a</sup> Shutian Xuanyuan,<sup>a</sup> and Chuang Xie,<sup>\*ab</sup>

<sup>a</sup> School of Chemical Engineering and Technology, State Key Laboratory of Chemical Engineering, Tianjin University, Tianjin 300072, China.

<sup>b</sup> National Engineering Research Center of Industrial Crystallization Technology, Tianjin University, Tianjin 300072, China

E-mail: [acxie@tju.edu.cn](mailto:acxie@tju.edu.cn)

#### **Table of Contents**

Movie S1 Crystal habit changes by inversion.

Fig. S1 Form III Raman spectra of different crystal habits.

Table S1 **Preparation method of sulfathiazole pure polymorph and single crystal structure identifier from CCDC used to obtain standard simulated PXRD patterns.**

Fig. S2 Solubility of ST Form II, Form III and Form IV in aqueous solution from 285-333 K and polymorphs obtained by cooling crystallization with different supersaturation at 298K.

Fig. S3 GWSs with different gelatin concentrations.  $T=288\text{K}$ ,  $S=9.0$ .

Table S2 Solubility of ST Form II in aqueous solution.

Table S3 Solubility of ST Form III in aqueous solution.

Table S4 Solubility of ST Form IV in aqueous solution.

**Fig. S4** The effect of different cooling rates on the ST morphology. Gelatin concentration and initial supersaturation are marked on the graph.

**Fig. S5** Crystallization of GWSs with different gelatin concentrations.

**Fig. S6** Nucleation induction period of ST in different concentrations of GWSs.

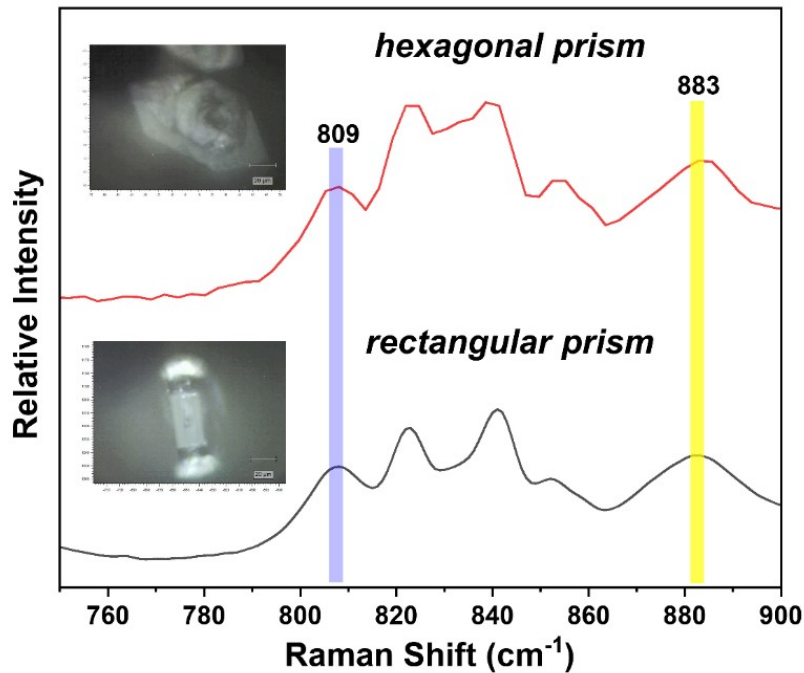

**Fig. S1** Form III Raman spectra of different crystal habits.

**Table S1** Preparation method of sulfathiazole pure polymorph and single crystal structure identifier from CCDC used to obtain standard simulated PXRD patterns.

| Polymorph | Identifier | Solvent | Cooling rate | Temperature range |
|-----------|------------|---------|--------------|-------------------|
| Form II   | SUTHAZ     |         |              |                   |
| Form III  | SUTHAZ02   | Water   | 0.1K/min     | 353K→293K         |
| Form IV   | SUTHAZ04   | Water   | Rapid        | 353K→277K         |

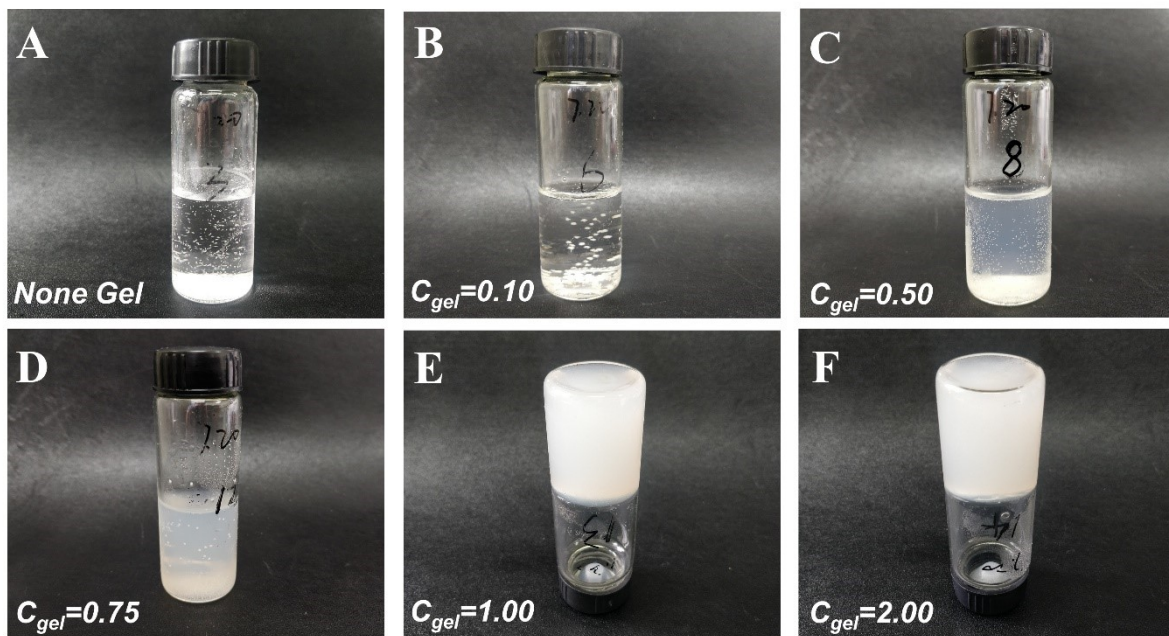

Fig. S2 GWSs with different gelatin concentrations.  $T=288.15\text{k}$ ,  $S=9.0$ .

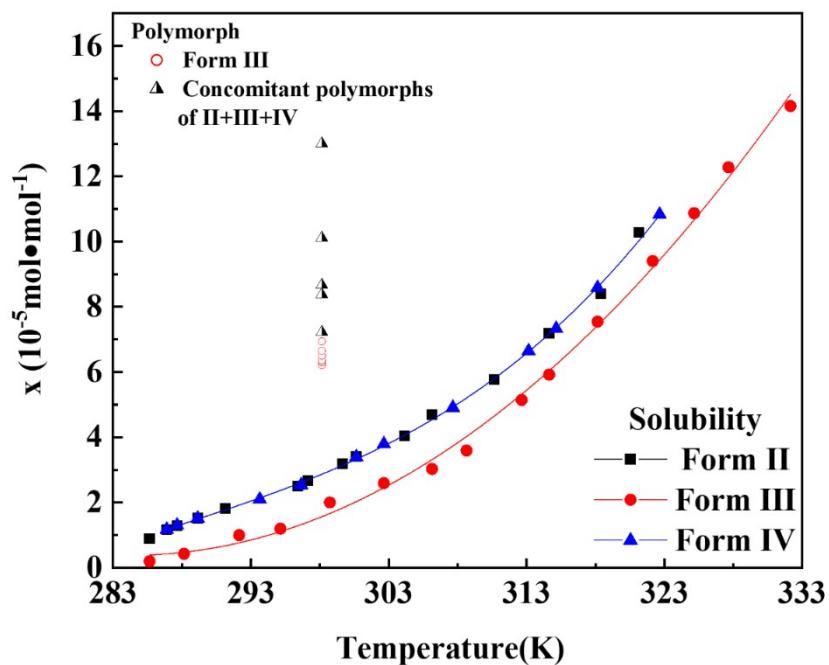

Fig. S3 Solubility of ST Form II, Form III and Form IV in aqueous solution from 285-333 K and polymorphs obtained by cooling crystallization with different supersaturation at 298K.

**Table S2** Solubility of ST Form II in aqueous solution.

| Temperature<br>(K) | Solubility<br>( $10^{-5}$ mol·mol <sup>-1</sup> ) |
|--------------------|---------------------------------------------------|
| 285.65             | 0.893                                             |
| 286.9              | 1.173                                             |
| 287.65             | 1.290                                             |
| 289.15             | 1.516                                             |
| 291.15             | 1.821                                             |
| 296.4              | 2.491                                             |
| 297.15             | 2.679                                             |
| 299.65             | 3.196                                             |
| 300.65             | 3.407                                             |
| 304.15             | 4.054                                             |
| 306.15             | 4.700                                             |
| 310.65             | 5.769                                             |
| 314.65             | 7.190                                             |
| 318.4              | 8.401                                             |
| 321.15             | 10.280                                            |

**Table S3.** Solubility of ST Form III in aqueous solution.

| Temperature<br>(K) | Solubility<br>( $10^{-5} \text{ mol} \cdot \text{mol}^{-1}$ ) |
|--------------------|---------------------------------------------------------------|
| 288.15             | 0.430                                                         |
| 285.65             | 0.205                                                         |
| 292.15             | 0.998                                                         |
| 295.15             | 1.203                                                         |
| 298.73             | 2.004                                                         |
| 302.65             | 2.594                                                         |
| 306.15             | 3.031                                                         |
| 308.65             | 3.595                                                         |
| 312.65             | 5.146                                                         |
| 314.65             | 5.922                                                         |
| 318.15             | 7.543                                                         |
| 322.15             | 9.404                                                         |
| 325.15             | 10.870                                                        |
| 327.15             | 12.280                                                        |
| 332.15             | 14.154                                                        |

**Table S4** Solubility of ST Form IV in aqueous solution.

| Temperature<br>(K) | Solubility<br>( $10^{-5}$ mol·mol <sup>-1</sup> ) |
|--------------------|---------------------------------------------------|
| 286.9              | 1.175                                             |
| 287.65             | 1.300                                             |
| 289.15             | 1.516                                             |
| 293.65             | 2.100                                             |
| 296.65             | 2.538                                             |
| 300.65             | 3.396                                             |
| 302.65             | 3.795                                             |
| 307.65             | 4.911                                             |
| 313.15             | 6.644                                             |
| 315.15             | 7.331                                             |
| 318.15             | 8.588                                             |
| 322.65             | 10.832                                            |

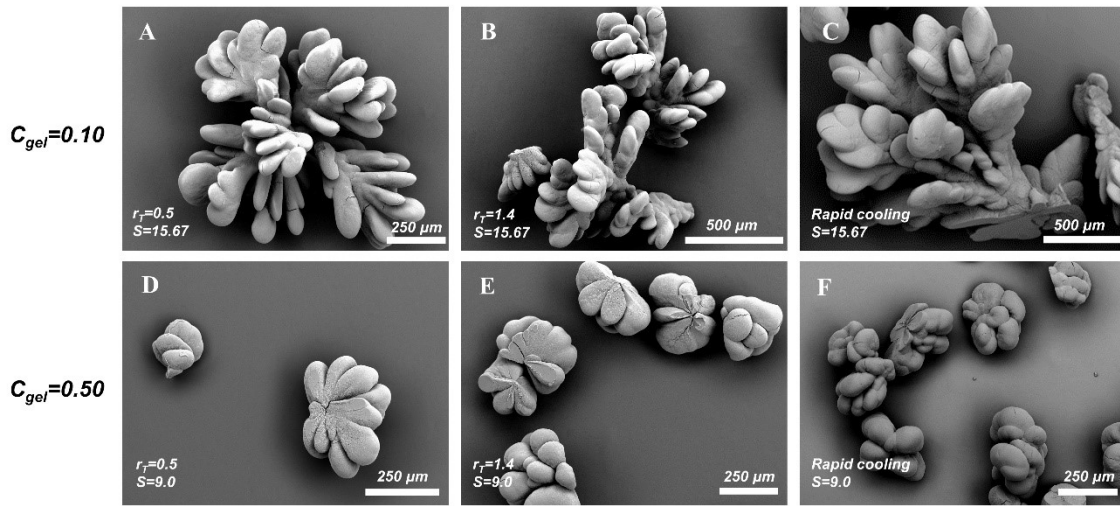

**Fig. S4** The effect of different cooling rates on the ST morphology. Gelatin concentration and initial supersaturation are marked on the graph.

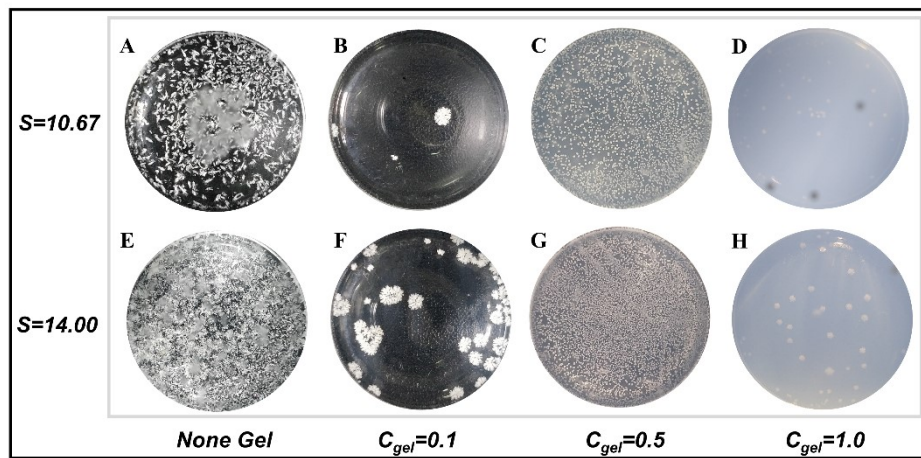

**Fig. S5** Crystallization of GWSs with different gelatin concentrations.

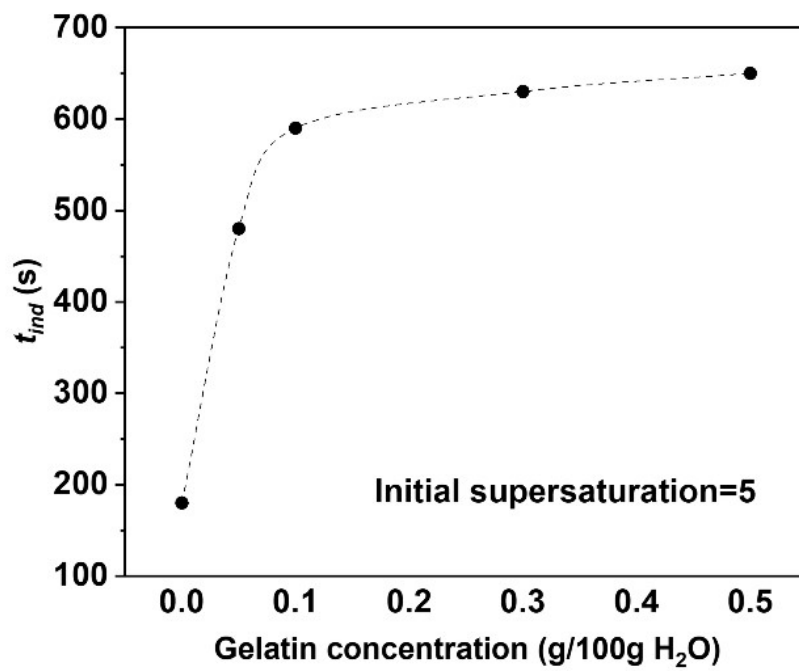

**Fig. S6** Nucleation induction period of ST in different concentrations of GWSs.
